# Supplementary material for: Ubiquitin-interacting motifs of ataxin-3 regulate its polyglutamine toxicity through Hsc70-4-dependent aggregation
Source: eLife. 2020 Sep 21;9:e60742. doi: 10.7554/eLife.60742 (PMC7505662; doi:10.7554/eLife.60742)
Supplement: Figure 1—source data 1. [file elife-60742-fig1-data1.xlsx]

## Sheet: Figure 1C
Day	1	2	3	4	5	6	7	8	9	10	11	12	13	14	15	16	17	18	19	20	21	22	23	24	25	26	27	28	29	30	31	32	33	34	35	36	37	38	39	40	41	42	43	44	45	46	47	48	49
UbS2*	20	20	20	20	20	20	20	20	20	20	20	20	20	20	20	20	20	18	17	17	14	11	9	9	5	4	4	2	0
	20	20	20	20	20	20	20	20	20	20	20	20	20	20	20	20	20	20	20	4	4	4	4	4	4	4	1	1	1	0
	20	20	19	19	19	19	19	18	18	18	18	18	18	18	15	15	15	15	15	15	15	9	9	9	9	8	7	7	7	7	7	7	7	1	1	0
	20	20	20	20	20	20	20	20	20	20	19	19	19	19	19	19	19	19	18	16	16	14	13	11	10	9	7	7	7	3	3	3	0
	20	20	19	19	19	19	19	19	19	19	19	19	19	19	19	19	19	18	17	17	17	17	13	12	8	7	7	7	4	4	4	4	4	1	1	1	1	0
	21	21	19	19	19	19	19	19	19	19	19	19	19	19	19	19	19	19	19	17	17	17	8	7	2	2	2	2	2	2	1	1	1	1	1	0
	22	22	22	22	22	22	22	22	22	22	22	22	22	22	22	19	19	19	19	17	15	13	11	11	9	9	7	3	1	0
	22	22	22	22	22	22	22	22	22	22	22	22	22	22	22	22	21	19	19	19	13	12	11	10	10	9	9	7	2	2	1	0
	22	22	22	22	22	22	22	22	22	22	22	22	22	22	22	22	22	22	22	22	22	21	19	15	13	12	12	9	4	4	3	1	1	1	1	0
	23	23	23	23	23	23	23	23	23	23	23	22	22	22	22	22	21	20	19	19	13	12	5	3	2	2	2	1	1	1	0
	23	23	23	23	23	23	23	23	23	23	23	23	23	23	23	21	21	21	21	21	21	17	17	14	12	12	8	2	2	1	0
	23	23	22	22	22	22	22	22	22	22	22	22	22	22	22	22	22	22	22	21	21	20	19	17	13	13	11	11	9	5	5	5	5	2	2	0
	23	23	23	23	23	23	23	23	23	23	23	23	23	23	23	23	23	23	23	23	22	18	17	16	15	14	14	13	8	6	5	2	2	2	1	1	0
	24	24	24	24	24	24	24	23	23	23	23	23	23	23	23	23	23	23	23	23	23	16	15	15	11	11	10	10	8	2	2	0
	24	24	24	24	24	24	24	24	24	24	24	24	24	24	24	24	24	23	23	21	20	18	17	15	12	12	12	7	2	0
	327	327	322	322	322	322	322	320	320	320	319	318	318	318	315	310	308	301	297	272	253	219	187	168	135	128	113	89	58	37	31	23	20	8	7	2	1	0
	1	1	0.984709	0.984709	0.984709	0.984709	0.984709	0.978593	0.978593	0.978593	0.975535	0.972477	0.972477	0.972477	0.963303	0.948012	0.941896	0.920489	0.908257	0.831804	0.7737	0.669725	0.571865	0.513761	0.412844	0.391437	0.345566	0.272171	0.17737	0.11315	0.0948012	0.0703364	0.0611621	0.0244648	0.0214067	0.00611621	0.0030581	0
Inactive	16	16	16	16	16	16	16	16	16	16	16	15	15	15	15	15	15	15	14	14	14	13	13	12	9	7	7	6	5	5	3	3	3	3	1	0
	17	17	17	17	17	17	17	17	17	17	17	17	17	17	17	17	17	17	17	17	15	14	14	12	8	5	5	4	1	1	1	0
	17	17	17	17	17	17	17	17	17	17	17	17	17	17	17	14	14	14	14	14	10	10	10	10	10	9	9	7	5	5	5	5	5	5	0
	20	20	20	20	20	20	20	20	20	20	20	20	20	20	20	20	20	20	19	19	19	19	17	16	16	16	12	12	11	7	7	7	1	1	1	0
	21	21	21	21	21	21	21	21	21	21	21	21	21	20	20	20	20	20	19	19	18	18	15	13	12	11	11	8	6	5	4	2	1	1	0
	22	22	22	22	22	22	22	22	22	22	22	22	22	22	22	22	22	22	21	21	19	14	13	9	7	5	5	1	1	1	0
	23	23	23	23	23	23	23	23	23	23	23	23	23	23	23	23	22	21	21	21	21	20	20	19	14	14	14	12	12	9	8	7	7	3	2	0
	23	23	23	23	23	23	23	23	23	23	23	23	23	23	23	22	22	22	21	21	19	19	19	16	16	15	15	7	4	3	3	2	2	2	0
	24	24	24	24	24	24	24	24	24	24	24	24	24	24	24	23	23	23	20	20	19	16	12	7	7	4	4	2	1	1	0
	24	24	24	24	24	24	24	24	23	23	23	23	23	23	23	23	21	14	6	4	4	4	4	3	1	1	0
	24	24	24	24	24	24	24	24	24	24	24	24	24	24	24	22	19	19	19	19	19	19	18	15	15	13	10	10	10	5	4	4	0
	24	24	24	24	24	24	24	24	24	24	24	24	24	18	16	16	16	16	16	16	16	16	16	11	11	10	10	8	6	6	4	2	1	1	0
	255	255	255	255	255	255	255	255	254	254	254	253	253	246	244	237	231	223	207	205	193	182	171	143	126	110	102	77	62	48	39	32	20	16	4	0
	1	1	1	1	1	1	1	1	0.996078	0.996078	0.996078	0.992157	0.992157	0.964706	0.956863	0.929412	0.905882	0.87451	0.811765	0.803922	0.756863	0.713725	0.670588	0.560784	0.494118	0.431373	0.4	0.301961	0.243137	0.188235	0.152941	0.12549	0.0784314	0.0627451	0.0156863	0
VBM*	17	17	17	17	17	17	17	17	17	17	17	17	17	17	17	17	17	17	17	16	16	16	16	16	16	16	16	16	16	16	16	16	16	15	15	13	12	12	11	10	10	10	10	9	8	5	5	5	5
	17	17	16	16	16	16	16	16	16	16	16	16	16	16	16	16	16	16	16	16	16	16	16	16	16	16	16	16	16	16	16	16	16	16	16	16	15	15	14	14	14	13	12	12	12	11	11	11	5
	18	18	18	18	18	18	18	18	18	18	18	18	18	18	18	18	18	18	18	18	18	18	18	18	18	18	17	17	16	16	15	15	15	15	15	13	12	12	12	12	12	12	12	11	8	8	8	4	3
	20	20	20	20	20	20	20	20	20	20	20	20	20	20	20	20	20	20	20	20	20	20	20	20	20	20	20	20	20	20	20	19	19	19	19	19	19	19	19	18	17	17	14	12	12	9	3	3	3
	20	20	20	20	20	20	20	20	20	20	20	20	20	20	20	20	20	20	20	20	20	20	20	20	20	20	20	20	20	20	20	20	20	20	20	20	17	17	13	13	13	11	6	5	4	2	2	2	2
	20	20	20	20	20	20	20	20	20	20	20	20	20	20	20	20	20	20	20	20	20	20	20	20	20	20	20	20	20	20	20	20	19	15	13	12	11	9	9	9	7	6	6	2	2	2	2	2	1
	20	20	20	20	20	20	20	20	20	20	20	20	20	20	20	20	20	20	20	20	20	20	20	20	20	20	20	20	20	20	20	20	20	20	18	18	18	17	10	16	16	16	15	15	15	14	14	14	12
	21	21	21	21	21	21	21	21	21	21	21	21	21	21	21	21	21	21	21	21	21	21	21	21	21	21	21	21	21	21	21	21	21	21	21	18	18	18	18	17	17	16	12	12	11	6	6	6	5
	21	21	21	21	21	21	21	21	21	21	21	21	21	21	21	21	21	21	21	21	21	21	21	21	21	21	21	21	21	21	21	21	21	21	21	21	21	20	18	17	16	16	15	14	13	13	10	9	9
	21	21	21	21	21	20	20	20	20	20	20	20	20	20	20	20	20	20	20	19	19	19	19	19	19	19	19	19	19	18	18	18	18	18	18	18	18	18	17	15	14	14	13	10	8	7	7	2	2
	21	21	21	21	21	21	21	21	21	21	21	21	21	21	21	21	21	21	21	21	21	21	21	21	21	21	21	21	21	21	21	21	21	21	21	20	20	19	19	19	16	15	15	14	13	12	12	10	10
	22	22	22	22	22	22	22	22	22	22	22	22	22	22	22	22	22	22	22	22	22	22	22	22	22	22	22	22	22	22	22	22	22	22	22	22	19	18	18	11	8	6	6	3	3	3	2	1	0
	24	24	24	24	24	24	24	24	24	24	24	24	24	24	24	24	24	24	24	24	24	24	24	22	22	22	22	22	22	22	22	22	22	22	22	22	22	22	20	19	19	16	16	16	14	8	8	2	1
	24	24	24	24	24	24	24	24	24	24	24	24	24	24	24	24	24	24	24	24	24	24	24	24	24	23	23	23	23	23	23	23	23	23	23	22	22	22	20	19	17	17	15	15	15	12	9	8	4
	24	24	24	24	24	24	24	23	23	23	23	23	23	23	23	23	23	23	23	23	23	23	23	23	23	23	23	23	22	22	22	22	22	22	22	22	22	21	21	20	20	18	17	13	13	13	11	8	5
	24	24	24	24	24	24	24	24	24	24	24	24	24	24	24	24	24	24	24	24	24	24	24	24	24	24	24	24	24	24	24	24	24	24	24	24	23	23	23	21	21	21	20	17	16	13	12	10	10
	334	334	333	333	333	332	332	331	331	331	331	331	331	331	331	331	331	331	331	329	329	329	329	327	327	326	325	325	323	322	321	320	319	314	310	300	289	282	262	250	237	224	204	180	167	138	122	97	77
	1	1	0.997006	0.997006	0.997006	0.994012	0.994012	0.991018	0.991018	0.991018	0.991018	0.991018	0.991018	0.991018	0.991018	0.991018	0.991018	0.991018	0.991018	0.98503	0.98503	0.98503	0.98503	0.979042	0.979042	0.976048	0.973054	0.973054	0.967066	0.964072	0.961078	0.958084	0.95509	0.94012	0.928144	0.898204	0.865269	0.844311	0.784431	0.748503	0.709581	0.670659	0.610778	0.538922	0.5	0.413174	0.365269	0.290419	0.230539
SCA3 Intact	18	18	18	18	18	18	18	18	18	18	18	18	18	18	18	18	18	18	18	18	18	18	16	16	16	16	16	15	15	15	15	14	14	14	11	11	9	8	6	1	0
	18	18	18	18	18	18	18	18	18	18	18	18	18	18	18	18	18	18	18	18	18	18	18	18	17	17	17	16	16	12	11	9	9	9	7	4	3	1	0
	19	19	19	19	19	19	19	18	18	18	18	18	18	18	18	18	18	18	18	18	18	18	18	17	17	17	17	17	16	15	11	10	10	10	2	2	2	1	1	1	1	0
	20	20	20	20	20	20	20	20	20	20	20	20	20	20	20	20	19	19	19	19	19	19	19	19	19	19	19	19	18	18	18	16	14	14	12	9	8	8	7	7	7	4	3	2	2	0
	20	20	20	20	20	20	20	20	20	19	19	19	19	19	19	19	19	19	19	19	19	19	19	19	19	19	19	18	16	15	14	11	10	10	7	6	6	4	2	2	2	2	0
	20	20	19	19	19	19	19	19	19	19	19	19	19	19	19	19	19	19	19	19	19	19	18	18	16	16	15	15	13	9	9	4	3	3	3	3	2	2	1	1	1	1	1	1	1	1	1	1	1
	20	20	20	20	20	20	20	20	20	20	20	20	20	20	20	20	20	20	20	20	20	20	20	20	19	19	19	19	19	19	19	17	13	12	12	12	10	10	9	8	8	7	5	3	1	1	1	1	1
	20	20	20	20	20	20	20	20	20	20	20	20	20	20	20	20	20	20	20	20	20	20	18	18	17	17	17	17	9	9	6	5	5	5	5	5	5	5	5	5	5	4	4	4	4	4	3	3	3
	21	21	21	21	21	21	21	21	21	21	21	21	20	20	20	20	20	20	20	20	20	19	19	19	19	19	19	19	19	19	19	17	15	15	13	8	5	3	2	2	2	2	0
	21	21	21	21	21	21	21	21	21	21	21	21	21	21	21	21	21	21	21	21	21	21	17	17	17	17	15	9	9	9	8	8	4	3	2	2	2	1	1	0
	22	22	22	22	22	22	22	22	22	22	22	22	22	22	22	22	22	18	17	15	12	12	12	12	12	12	12	12	10	7	7	5	5	5	5	3	1	1	1	0
	22	22	22	22	22	22	22	22	22	22	22	22	21	21	21	21	21	21	21	20	20	20	20	18	18	18	18	18	17	17	13	10	8	8	3	3	3	3	1	1	1	0
	22	22	22	22	22	22	22	22	22	22	22	22	22	22	22	22	22	22	22	22	22	22	22	22	21	21	21	19	17	14	13	8	8	8	5	2	1	1	0
	23	23	23	23	23	23	23	23	23	23	23	23	23	23	23	23	23	23	23	23	23	23	23	23	23	23	18	18	17	13	13	13	11	6	4	3	3	3	3	3	1	1	0
	23	23	23	23	23	23	23	23	23	23	23	23	23	23	23	23	23	23	23	23	23	23	22	22	22	22	18	18	18	17	15	15	13	7	6	6	5	5	5	5	4	3	1	0
	24	24	24	24	24	24	24	24	24	24	24	24	24	24	24	24	24	24	24	24	24	23	23	23	22	22	22	20	15	15	15	14	13	13	11	1	1	0
	333	333	332	332	332	332	332	331	331	330	330	330	328	328	328	328	327	323	322	319	316	314	304	301	294	294	282	269	244	223	206	176	155	142	108	80	66	56	44	36	32	24	14	10	8	6	5	5	5
	1	1	0.996997	0.996997	0.996997	0.996997	0.996997	0.993994	0.993994	0.990991	0.990991	0.990991	0.984985	0.984985	0.984985	0.984985	0.981982	0.96997	0.966967	0.957958	0.948949	0.942943	0.912913	0.903904	0.882883	0.882883	0.846847	0.807808	0.732733	0.66967	0.618619	0.528529	0.465465	0.426426	0.324324	0.24024	0.198198	0.168168	0.132132	0.108108	0.0960961	0.0720721	0.042042	0.03003	0.024024	0.018018	0.015015	0.015015	0.015015
Ctrl	18	18	18	18	18	18	18	18	18	18	18	18	18	18	18	18	18	18	18	18	18	18	18	17	16	16	16	16	16	16	15	15	15	15	15	15	15	15	15	15	14	13	12	11	11	11	11	11	10
	18	18	18	18	18	18	18	18	18	18	18	18	18	18	18	18	18	18	18	18	18	18	18	18	18	18	18	18	18	18	18	18	18	18	18	18	18	18	18	18	18	18	18	18	18	18	18	17	17
	19	19	19	19	19	19	19	19	19	19	19	19	19	19	19	19	19	19	19	19	19	19	19	19	19	19	18	18	18	18	18	18	18	17	17	17	17	17	17	17	14	14	14	14	14	14	14	13	13
	19	19	19	19	19	19	19	19	19	19	19	19	19	19	19	19	19	19	19	19	18	18	18	18	18	17	17	17	17	17	16	16	14	13	12	12	12	12	12	12	12	11	11	11	11	10	10	10	9
	19	19	19	19	19	19	19	19	19	19	19	19	19	19	19	19	19	19	19	19	19	19	19	19	19	19	19	19	19	19	19	19	19	19	19	19	19	19	19	19	18	18	18	18	17	17	17	16	16
	20	20	20	20	20	20	20	20	20	19	19	19	19	19	19	19	19	19	19	19	19	19	19	19	19	19	19	19	19	19	19	19	18	18	18	18	18	18	18	18	18	18	18	18	18	18	16	15	13
	20	20	20	20	20	20	20	20	20	20	20	20	20	20	20	20	20	20	20	20	20	20	20	20	20	20	20	20	20	20	20	20	20	20	19	19	19	19	19	18	18	16	16	15	13	13	12	12	12
	21	21	21	21	21	21	21	21	21	21	21	21	21	21	21	21	21	21	21	21	21	21	21	21	21	21	21	21	21	19	19	19	19	19	16	16	16	16	13	13	13	13	13	13	13	13	13	13	13
	22	22	22	22	22	22	22	22	22	22	22	22	22	22	22	22	22	22	22	22	22	22	22	22	22	22	22	22	21	21	20	20	20	20	20	20	20	20	20	20	20	20	19	19	18	18	17	16	16
	22	22	22	22	22	22	22	22	22	22	22	22	22	22	22	22	22	22	22	22	22	22	22	22	22	22	22	22	22	22	22	22	21	21	21	21	21	21	21	21	20	20	20	20	20	20	20	16	16
	23	23	23	23	23	23	23	23	23	23	23	23	23	23	23	23	23	23	23	23	23	23	23	23	23	23	23	23	23	23	23	23	23	23	22	22	22	22	22	22	22	22	20	20	19	19	19	19	19
	24	24	24	24	24	24	24	24	24	24	24	24	24	24	24	24	24	24	24	24	24	24	24	24	24	24	24	24	24	24	24	24	24	24	24	23	23	23	23	23	23	23	23	22	22	22	22	21	21
	24	24	24	24	24	24	24	24	24	24	24	24	24	24	24	24	24	24	24	24	24	24	24	24	24	24	24	24	24	24	24	22	22	22	22	22	22	22	22	22	22	22	22	22	22	22	22	22	22
	25	25	25	25	25	25	25	24	24	24	24	24	24	24	24	24	24	24	24	24	24	24	24	24	22	22	22	22	22	22	22	22	22	22	22	21	21	21	20	18	18	18	17	16	16	15	15	13	13
	25	25	25	25	25	25	25	25	25	25	25	25	25	25	25	25	25	25	25	25	25	25	25	25	25	25	25	25	25	25	25	25	25	25	25	25	25	25	24	24	24	24	23	22	22	21	21	21	21
	319	319	319	319	319	319	319	318	318	317	317	317	317	317	317	317	317	317	317	317	316	316	316	315	312	311	310	310	309	307	304	302	298	296	290	288	288	288	283	280	274	270	264	259	254	251	247	235	231
	1	1	1	1	1	1	1	0.996865	0.996865	0.99373	0.99373	0.99373	0.99373	0.99373	0.99373	0.99373	0.99373	0.99373	0.99373	0.99373	0.990596	0.990596	0.990596	0.987461	0.978056	0.974922	0.971787	0.971787	0.968652	0.962382	0.952978	0.946708	0.934169	0.9279	0.909091	0.902821	0.902821	0.902821	0.887147	0.877743	0.858934	0.846395	0.827586	0.811912	0.796238	0.786834	0.774295	0.736677	0.724138
[truncated: 37 more columns]

## Sheet: Figure 1D
Genotype	# 5s	# 15s	# 30s		Total			# 5s	# 15s	# 30s		Total			# 5s	# 15s	# 30s		Total			# 5s	# 15s	# 30s		Total			# 5s	# 15s	# 30s		Total			# 5s	# 15s	# 30s		Total
Day 7							Day 14							Day 21							Day 28							Day 35							Day 42
Ctrl	9	20	21		21			13	19	21		21			11	19	20		21			5	18	21		21			1	15	17		21			2	14	15		20
	11	19	19		19			10	14	19		19			9	17	18		19			6	16	18		19			0	8	12		12			2	9	9		12
	10	16	18		18			11	16	17		18			8	15	18		18			6	17	17		18			0	12	13		16			3	10	10		14
	10	22	22		22			10	19	20		20			9	19	20		20			5	19	20		20			0	15	17		20			3	16	18		20
	8	11	14		20			6	18	20		20			7	18	20		20			0	13	16		20			2	14	16		19			0	10	14		16
Intact	7	18	20		20			9	18	20		20			8	15	15		15			0	6	9		11			0	0	0		1			dead
	7	14	15		15			9	14	15		15			7	15	19		19			0	1	10		10			0	1	2		3			dead
	9	22	24		26			12	17	18		18			2	14	18		18			3	12	14		15			0	2	4		5			dead
	10	16	20		20			10	17	19		19			7	16	18		19			3	16	17		18			0	2	2		4			dead
	9	17	19		19			14	19	25		26			12	18	23		26			3	13	15		17			0	0	0		2			dead
Inactive	10	15	18		18			7	16	17		19			4	4	4		15			0	1	2		5			dead							dead
	7	18	20		20			12	16	18		19			7	12	15		18			0	4	7		9			dead							dead
	11	17	21		21			10	18	19		21			5	12	15		18			0	2	3		4			dead							dead
	13	20	23		26			12	17	18		18			2	13	14		18			0	2	4		6			dead							dead
	12	16	20		20			11	15	18		20			6	15	16		18			0	3	7		10			dead							dead
	13	17	19		20			14	19	19		20			2	5	9		13			0	4	7		7			dead							dead
UBS2*	15	20	20		20			10	17	19		19			9	13	13		13			0	0	0		dead			dead							dead
	8	17	20		20			6	19	19		19			9	13	13		15			0	0	2		2			dead							dead
	8	20	20		20			6	18	22		22			8	14	14		17			0	0	1		3			dead							dead
	9	22	22		22			7	20	20		20			0	4	4		4			0	0	0		1			dead							dead
	6	18	19		20			7	18	19		19			9	11	13		15			0	0	0		1			dead							dead
VBM*	8	20	24		24			11	23	24		24			12	20	23		24			9	22	23		24			3	20	20		24			0	4	6		7
	8	13	16		16			12	17	23		23			7	19	21		23			10	16	19		20			0	13	15		18			2	8	10		12
	10	15	18		23			13	18	20		20			9	16	16		16			4	20	22		22			1	15	18		19			1	13	13		16
	10	18	21		21			13	16	16		16			9	13	17		20			3	15	15		16			0	9	10		12			1	8	8		10
	10	17	19		20			11	19	20		20			8	18	19		20			4	18	20		20			0	16	18		20			2	9	11		14
