# Supplementary material for: Ubiquitin-interacting motifs of ataxin-3 regulate its polyglutamine toxicity through Hsc70-4-dependent aggregation
Source: eLife. 2020 Sep 21;9:e60742. doi: 10.7554/eLife.60742 (PMC7505662; doi:10.7554/eLife.60742)
Supplement: Figure 2—source data 1. [file elife-60742-fig2-data1.xlsx]

## Sheet: Figure 2E
Day	1	2	3	4	5	6	7	8	9	10	11	12	13	14	15	16	17	18	19	20	21	22	23	24	25	26	27	28	29	30	31	32	33	34	35	36	37	38	39	40	41	42	43	44	45	46	47	48	49
80Q	18	18	18	18	18	18	18	18	18	18	18	18	18	16	16	15	13	10	8	4	4	3	3	2	1	1	1	0
	23	23	23	23	23	23	23	23	23	23	23	23	23	23	23	23	21	17	16	13	11	9	7	6	1	1	1	1	1	1	0
	23	23	23	23	23	23	23	23	23	23	23	23	23	23	23	22	17	13	13	9	6	1	0
	24	24	24	24	24	24	24	24	24	24	24	24	24	24	24	24	22	20	18	17	13	10	8	6	4	2	1	1	1	1	0
	25	25	25	25	25	25	25	25	25	25	25	25	25	25	25	24	23	21	17	12	3	2	2	1	1	0
	26	26	26	26	26	26	26	26	26	26	26	26	26	23	15	14	10	7	2	2	2	1	1	1	0
	27	27	27	27	27	27	27	27	27	27	27	27	27	27	27	25	23	20	15	7	0
	27	27	27	27	27	27	27	27	27	27	27	27	27	27	27	26	25	23	17	15	10	5	4	3	1	1	0
	28	28	28	28	28	28	28	28	28	28	28	28	28	28	28	27	26	24	18	11	3	2	0
	28	28	28	28	28	28	28	28	28	28	28	28	28	28	28	28	28	27	22	15	6	3	1	1	0
	29	29	29	29	29	29	29	29	29	29	29	29	29	29	28	28	27	24	21	17	4	2	2	1	0
	29	29	29	29	29	29	29	29	29	29	28	28	28	28	27	27	26	21	21	19	7	3	1	0
	307	307	307	307	307	307	307	307	307	307	306	306	306	301	291	283	261	227	188	141	69	41	29	21	8	5	3	2	2	2	0
	1	1	1	1	1	1	1	1	1	1	0.996743	0.996743	0.996743	0.980456	0.947883	0.921824	0.850163	0.739414	0.612378	0.459283	0.224756	0.13355	0.0944625	0.0684039	0.0260586	0.0162866	0.00977199	0.00651466	0.00651466	0.00651466	0
Day	1	2	3	4	5	6	7	8	9	10	11	12	13	14	15	16	17	18	19	20	21	22	23	24	25	26	27	28	29	30	31	32	33	34	35	36	37	38	39	40
UIM1-2-Q80-UIM3
	20	20	20	20	20	20	20	15	11	10	7	5	1
	20	20	20	20	20	20	18	15	9	9	7	3	1	0
	20	20	20	20	20	20	20	20	18	14	6	2	0
	20	20	20	20	20	20	20	20	20	14	12	8	9	7	6	4	1	0
	21	21	21	21	21	21	20	17	10	9	5	3	0
	21	21	21	21	21	20	20	18	10	6	3	2	0
	21	21	20	20	20	20	17	16	15	13	7	3	0
	21	21	21	21	19	19	15	14	13	10	5	1	0
	22	22	22	21	21	21	20	17	15	3	0
	22	22	22	22	22	22	21	16	10	6	5	3	3	0
	23	23	23	23	23	23	21	19	15	9	6	0
	23	23	22	22	22	22	22	18	16	9	4	0
	23	23	23	23	23	23	23	23	21	19	16	12	9	9	5	4	3	0
	24	24	24	24	24	24	24	23	20	15	9	5	0
	24	23	23	23	23	23	21	20	18	12	6	2	1	0
	24	22	22	22	22	22	20	18	16	10	5	1	1	1	0
	24	24	24	21	21	21	20	19	16	5	1	0
	24	24	24	24	24	24	19	19	17	12	4	1	0
	25	25	24	24	24	24	23	21	19	16	8	2	2	0
	25	25	25	24	24	24	23	19	14	11	3	1	1	0
	25	25	25	25	25	25	24	22	19	15	5	3	0
	26	26	26	26	25	25	23	20	17	10	2	1	1	0
	26	26	26	26	26	26	25	22	15	5	3	1	0
	27	27	27	27	27	27	25	24	14	7	3	0
	28	28	28	28	28	28	28	26	18	15	9	4	2	1	1	0
	29	29	29	29	28	28	25	15	9	7	5	2	1	0
	29	29	29	29	29	28	27	27	20	12	7	6	0
	29	29	29	29	29	29	29	27	20	14	9	6	2	0
	30	30	30	30	30	30	30	27	27	27	10	7	6	5	4	3	1	0
	30	30	30	30	30	30	30	29	22	13	10	5	3	0
	726	723	720	715	711	709	673	606	484	337	182	89	43	23	16	11	5	0
	1	1	0.99	0.98	0.98	0.98	0.93	0.83	0.67	0.46	0.25	0.12	0.06	0.03	0.02	0.02	0.01	0
Ctrl	22	22	22	22	22	22	22	22	22	22	22	21	21	21	21	21	21	21	21	21	21	21	21	21	21	21	21	21	21	21	21	21	21	20	19	19	18	18	18	17	17	17	17	17	14	14	14	12	11
	22	22	22	22	22	22	22	22	22	22	22	22	22	22	22	22	22	22	22	22	22	22	22	22	22	22	21	21	21	21	21	20	20	20	20	20	20	20	20	20	20	20	20	20	20	19	19	19	19
	20	20	20	20	20	20	20	20	20	20	20	20	20	19	19	19	19	19	19	19	19	19	19	19	19	19	19	19	19	19	19	19	19	19	19	19	18	18	18	18	18	18	18	18	18	18	18	16	16
	20	20	20	20	20	20	20	20	20	20	20	20	20	19	19	19	19	19	19	19	19	19	19	19	19	19	19	19	19	19	19	19	19	19	18	18	18	18	18	18	18	18	18	18	18	18	18	17	17
	21	21	21	21	21	21	21	21	21	21	21	21	21	21	21	21	21	21	21	21	21	21	21	21	21	21	21	21	21	20	20	20	20	20	20	20	20	20	20	20	20	20	20	20	20	20	19	19	19
	22	22	22	22	22	22	22	22	22	22	22	22	22	22	22	22	22	22	22	22	22	22	22	22	22	22	22	22	22	22	22	21	21	21	21	21	21	21	21	21	21	21	20	18	18	18	18	16	15
	23	23	23	23	23	23	23	23	22	22	22	22	22	22	22	22	22	22	22	22	22	22	22	22	22	22	22	22	22	22	22	22	22	22	21	21	21	21	19	19	19	19	19	19	19	19	17	17	16
	150	150	150	150	150	150	150	150	149	149	149	148	148	146	146	146	146	146	146	146	146	146	146	146	146	146	145	145	145	144	144	142	142	141	138	138	136	136	134	133	133	133	132	130	127	126	123	116	113
	1	1	1	1	1	1	1	1	0.99	0.99	0.99	0.99	0.99	0.97	0.97	0.97	0.97	0.97	0.97	0.97	0.97	0.97	0.97	0.97	0.97	0.97	0.97	0.97	0.97	0.96	0.96	0.95	0.95	0.94	0.92	0.92	0.91	0.91	0.89	0.89	0.89	0.89	0.88	0.87	0.85	0.84	0.82	0.77	0.75
UIM1-2-Q80	18	18	18	18	18	18	17	16	13	11	11	5	5	5	2	1	1	0
	19	19	19	19	19	19	19	19	19	18	15	11	3	1	0
	19	19	19	19	19	19	19	19	19	18	16	7	3	1	1	0
	20	20	20	20	20	20	20	18	17	16	16	13	11	6	3	0
	20	20	20	20	20	20	20	20	17	15	12	6	3	1	0
	20	20	20	20	20	19	18	17	13	9	8	8	8	5	3	1	0
	21	21	21	21	21	21	21	21	21	18	17	14	11	5	5	3	2	0
	21	21	21	21	21	21	19	18	16	16	13	10	4	4	2	0
	22	22	22	22	22	22	22	22	22	20	16	12	7	5	2	0
	22	22	22	22	22	22	21	20	20	14	13	9	6	3	0
	22	22	22	22	22	22	19	17	15	10	8	7	4	1	1	0
	23	23	23	23	23	23	23	20	17	16	12	11	10	9	4	0
	23	23	23	23	23	23	21	19	17	16	13	12	4	0
	23	23	23	23	23	23	19	16	15	13	12	8	3	1	1	1	0
	23	23	23	23	23	23	23	22	16	9	4	1	0
	24	24	24	24	24	24	24	24	23	20	16	13	10	1	1	1	1	0
	25	25	25	25	25	25	24	22	20	12	6	4	2	1	1	1	1	0
	25	25	25	25	25	25	25	25	24	22	19	14	12	1	0
	26	26	26	26	26	23	22	19	18	17	15	13	10	7	2	2	2	1	0
	26	26	26	26	26	26	25	23	18	16	14	11	10	3	0
	27	27	27	27	27	27	27	27	27	27	27	25	23	15	10	7	5	0
	27	27	27	27	27	27	24	21	19	18	13	11	4	2	1	0
	29	29	29	29	29	29	27	26	21	13	8	6	3	1	1	1	1	1	1	0
	29	29	29	29	29	29	29	29	29	29	29	27	22	15	13	10	4	1	0
	29	29	29	29	29	29	29	29	29	24	18	10	5	4	3	1	0
	29	29	29	29	29	29	29	29	29	25	19	13	9	7	5	3	2	0
	612	612	612	612	612	608	586	558	514	442	370	281	192	104	61	32	19	3	1	0
	1	1	1	1	1	0.993464	0.957516	0.911765	0.839869	0.722222	0.604575	0.45915	0.313725	0.169935	0.0996732	0.0522876	0.0310458	0.00490196	0.00163399	0
Q80-UIM3	19	19	19	19	19	19	17	17	17	16	16	12	7	3	2	1	0
	20	20	20	20	20	20	19	19	19	18	18	18	18	17	15	8	4	1	1	0
	21	21	21	21	21	21	20	20	19	18	15	9	3	0
	22	22	22	22	22	22	22	22	22	20	20	20	16	12	6	0
	22	22	22	22	22	22	22	22	22	19	16	14	7	4	3	2	0
	24	24	24	24	24	24	23	22	21	19	16	10	4	1	0
	24	24	24	24	24	24	23	23	22	22	19	10	3	0
	25	25	25	25	25	25	25	25	25	25	23	21	21	15	11	6	2	0
	27	27	27	27	27	27	27	27	26	24	17	16	14	13	8	2	1	0
	28	28	28	28	28	28	28	28	28	26	26	25	20	11	9	9	4	1	0
	28	28	28	28	28	28	28	28	28	28	28	27	26	25	18	10	4	2	1	0
	29	29	29	29	29	29	29	29	29	29	26	22	16	6	2	1	1	1	0
	30	30	30	30	30	30	30	30	27	23	21	19	16	14	7	3	0
	30	30	30	30	30	30	30	30	30	27	25	22	15	11	4	1	0
	349	349	349	349	349	349	343	342	335	314	286	245	186	132	85	43	16	5	2	0
	1	1	1	1	1	1	0.982808	0.979943	0.959885	0.899713	0.819484	0.702006	0.532951	0.378223	0.243553	0.123209	0.0458453	0.0143266	0.00573066	0
[truncated: 32 more columns]
