# Supplementary material for: Ubiquitin-interacting motifs of ataxin-3 regulate its polyglutamine toxicity through Hsc70-4-dependent aggregation
Source: eLife. 2020 Sep 21;9:e60742. doi: 10.7554/eLife.60742 (PMC7505662; doi:10.7554/eLife.60742)
Supplement: Figure 3—source data 1. [file elife-60742-fig3-data1.xlsx]

## Sheet: Figure 3C
Day	1	2	3	4	5	6	7	8	9	10	11	12	13	14	15	16	17	18	19	20	21	22	23	24	25	26	27	28	29	30	31	32	33	34	35	36	37	38	39	40	41	42	43	44	45
UIM*	16	16	16	16	16	16	16	16	16	16	16	16	16	16	16	16	16	16	16	16	16	14	14	12	12	11	10	9	9	9	9	7	4	1	1	1	1	0
UIM*	16	16	16	16	15	15	15	15	15	15	15	15	15	15	15	15	15	15	15	14	14	13	13	13	11	8	8	8	8	8	8	8	7	7	7	2	0
UIM*	18	18	18	18	18	18	18	18	18	18	18	18	18	17	15	15	15	15	14	14	14	14	12	12	9	8	7	7	6	5	5	5	4	4	3	0
UIM*	18	18	18	18	18	18	18	18	18	18	18	8	8	8	8	8	7	7	6	6	5	5	5	4	2	2	2	2	2	2	2	2	2	2	2	1	1	1	1	1	0
UIM*	18	18	18	18	18	18	18	18	18	18	18	18	18	18	18	18	17	17	15	15	13	13	13	13	13	13	13	12	12	11	11	11	8	8	8	1	0
UIM*	18	18	18	18	18	18	18	18	18	18	18	18	18	18	18	18	18	18	18	18	18	17	16	13	13	13	11	8	8	7	6	6	6	6	6	4	4	3	3	0
UIM*	18	18	18	18	18	18	18	18	18	18	18	17	17	17	17	17	17	17	16	14	14	12	11	10	8	5	4	4	4	3	3	2	1	0
UIM*	19	19	19	19	19	19	19	19	19	19	19	19	19	19	16	16	16	13	12	12	12	11	11	11	11	10	9	9	9	9	9	8	6	6	3	3	3	3	2	0
UIM*	19	19	19	19	19	19	19	19	19	19	19	19	17	17	16	16	14	14	14	13	13	12	12	12	12	11	10	10	10	10	9	9	7	3	2	1	1	1	1	1	0
UIM*	19	19	19	19	19	19	19	19	19	19	19	19	19	19	18	18	18	18	18	18	18	17	16	16	15	14	10	10	9	8	7	6	4	3	3	3	3	3	1	0
UIM*	19	19	19	19	19	19	19	19	19	19	19	19	19	19	19	17	17	17	15	15	15	15	14	14	14	14	14	14	14	13	13	13	12	11	11	11	10	9	9	7	7	5	5	0
UIM*	19	19	19	19	19	19	19	19	19	19	19	19	17	16	16	15	14	14	14	14	14	14	11	11	11	11	9	9	9	8	6	5	5	4	4	3	2	2	0
UIM*	20	20	20	20	20	20	20	20	20	20	19	19	19	17	17	15	15	13	11	10	10	10	10	10	9	9	9	9	9	8	8	3	2	2	1	1	0
UIM*	20	20	19	19	19	14	13	13	13	12	12	12	11	9	9	9	8	8	8	6	5	4	4	4	4	4	4	4	4	4	4	4	4	0
UIM*	20	20	20	20	20	20	20	20	20	20	20	20	20	20	19	19	19	16	15	15	13	11	10	10	10	10	8	8	7	5	5	4	4	4	1	1	1	1	0
UIM*	20	20	20	20	20	20	20	20	20	20	20	20	20	20	20	20	20	20	19	19	18	18	18	17	17	15	15	15	15	14	13	12	11	11	11	10	8	4	2	2	1	0
UIM*	20	20	20	20	20	20	20	20	20	20	20	20	19	19	19	19	19	16	16	16	16	15	15	15	14	14	11	8	8	7	6	5	5	5	4	2	2	2	1	1	0
UIM*	21	21	21	21	21	21	21	21	21	21	21	21	21	18	18	18	18	15	15	12	11	11	11	10	10	9	9	8	8	7	7	7	7	7	7	7	6	5	2	2	1	0
UIM*	21	21	21	21	21	21	21	21	21	21	21	21	21	21	21	21	21	21	20	20	20	20	19	19	19	17	15	15	15	14	14	6	3	0
UIM*	21	21	21	21	21	21	21	21	21	21	21	21	21	21	20	19	19	19	19	18	18	17	17	17	15	15	15	13	13	13	10	10	10	9	9	9	8	6	4	3	3	0
UIM*	23	23	23	23	23	23	23	23	23	23	23	23	23	22	21	17	17	17	16	15	13	11	10	10	10	10	9	9	8	6	6	6	4	2	0
UIM*	23	23	23	23	23	23	23	23	23	23	23	23	23	23	23	22	22	22	21	19	19	18	11	11	11	11	11	11	11	11	11	9	6	6	5	5	1	1	0
	426	426	425	425	424	419	418	418	418	417	416	405	399	389	379	368	362	348	333	319	309	292	273	264	250	234	213	202	198	182	172	148	122	101	88	65	51	41	26	17	12	5	5	0
	1	1	0.998	0.998	0.995	0.984	0.981	0.981	0.981	0.979	0.977	0.951	0.937	0.913	0.89	0.864	0.85	0.817	0.782	0.749	0.725	0.685	0.641	0.62	0.587	0.549	0.5	0.474	0.465	0.427	0.404	0.347	0.286	0.237	0.207	0.153	0.12	0.096	0.061	0.04	0.028	0.012	0.012	0
Day	1	2	3	4	5	6	7	8	9	10	11	12	13	14	15	16	17	18	19	20	21	22	23	24	25	26	27	28	29	30	31	32	33	34	35	36	37	38	39	40	41	42	43	44	45
SCA3	16	16	16	16	15	15	15	15	15	15	15	15	13	11	10	10	10	5	4	4	4	4	4	2	1	1	0
SCA3	17	17	17	16	16	15	9	8	8	8	8	8	7	7	6	6	6	6	6	5	5	5	3	0
SCA3	17	17	17	17	15	14	13	8	8	8	8	6	4	4	4	4	4	4	1	0
SCA3	17	16	12	8	8	8	5	5	5	4	4	4	2	2	1	1	1	1	1	1	0
SCA3	17	17	17	17	17	16	16	16	14	12	9	6	4	4	0
SCA3	17	16	16	15	15	13	13	12	12	11	11	11	10	9	9	9	9	8	8	8	7	6	5	5	4	4	2	2	1	0
SCA3	17	17	17	17	16	12	10	10	10	10	10	9	8	7	7	6	5	5	4	4	3	3	3	3	1	1	1	0
SCA3	18	18	18	17	17	16	16	15	15	15	15	15	14	14	12	10	7	6	6	6	6	6	5	1	1	1	0
SCA3	18	18	18	17	17	17	17	13	13	13	13	12	12	12	10	9	6	6	5	5	5	0
SCA3	18	18	18	17	17	15	12	11	11	10	10	10	9	6	6	6	5	3	3	3	3	2	1	1	0
SCA3	18	18	18	17	16	16	16	16	15	15	15	13	12	9	8	7	7	7	5	5	5	5	5	3	3	0
SCA3	18	16	16	12	10	9	8	7	7	5	5	4	4	4	4	4	3	3	3	3	3	2	2	1	1	0
SCA3	19	19	19	18	17	16	13	12	11	10	10	8	8	8	7	7	5	2	2	2	1	1	1	1	0
SCA3	19	19	17	17	16	14	13	13	13	13	13	9	7	6	5	5	1	1	1	0
SCA3	19	19	17	17	16	15	13	13	13	12	10	10	8	7	0
SCA3	19	19	18	18	18	16	16	16	11	9	9	9	9	9	9	9	7	7	7	6	6	3	3	3	2	0
SCA3	19	19	19	18	17	16	16	15	13	13	12	11	10	8	8	6	5	5	4	4	2	2	2	2	2	2	2	2	1	0
SCA3	20	20	20	19	19	19	17	14	13	11	11	7	6	6	6	6	6	6	4	4	1	0
SCA3	20	20	18	13	13	13	9	7	6	6	6	6	2	2	2	2	1	0
SCA3	20	20	14	13	13	13	9	7	6	6	6	6	2	2	2	2	1	0
SCA3	20	19	16	15	13	12	11	11	10	9	5	4	4	4	4	3	3	1	1	1	1	1	0
SCA3	20	20	19	18	15	14	11	11	11	11	9	9	8	7	7	6	6	6	5	4	4	1	1	1	1	1	1	0
SCA3	21	21	19	19	19	19	18	17	17	15	15	15	13	13	10	8	3	1	0
SCA3	21	20	20	20	15	15	13	9	9	9	8	8	8	8	8	8	8	6	5	5	5	5	4	3	3	1	1	1	0
	445	439	416	391	370	348	309	281	266	250	237	215	184	169	145	134	109	89	75	70	61	46	39	26	19	11	7	5	2	0
	1	0.987	0.935	0.879	0.831	0.782	0.694	0.631	0.598	0.562	0.533	0.483	0.413	0.38	0.326	0.301	0.245	0.2	0.169	0.157	0.137	0.103	0.088	0.058	0.043	0.025	0.016	0.011	0.004	0

## Sheet: Figure 3DGenotype_x0009_# 5s_x0009_# 15s_x0009_# 
Genotype	# 5s	# 15s	# 30s		Total	Genotype	# 5s	# 15s	# 30s		Total	Genotype	# 5s	# 15s	# 30s		Total
Ctrl						Ctrl						Ctrl
	week 1						week 2						week 3
							7	9	10		10		7	10	10		10
	8	10	10		10		7	10	10		10		7	9	10		10
	7	9	10		10		7	10	10		10		7	10	10		10
	7	10	10		10		8	9	9		10		8	10	10		10
	7	10	10		10		7	10	10		10		7	10	10		10
	10	10	10		10		9	12	12		12		9	10	11		12
	12	12	12		12
SCA3-UIM*	9	9	10		10	SCA3-UIM*	9	10	10		10	SCA3-UIM*	2	9	10		10
	9	9	10		10		8	9	10		10		3	9	10		10
	8	9	10		10		9	10	10		10		2	9	10		10
	10	10	10		10		7	9	10		10		2	8	9		9
	9	9	10		10		9	10	10		10		1	9	10		10
	7	9	10		10		4	9	9		10		5	7	8		10
SCA3	7	8	10		10	SCA3	5	8	9		10	SCA3	1	4	7		8
	3	4	5		6		3	5	6		6		0	2	5		5
	6	8	9		10		4	7	9		9		0	0	1		2
	7	9	9		10		1	2	3		5		1	3	4		4
	8	10	10		10		1	5	6		7		0	0	3		7
	5	5	7		10		2	8	9		10
	4	7	9		10		3	5	7		7
	5	8	10		10		7	8	9		10
