# Supplementary material for: Ubiquitin-interacting motifs of ataxin-3 regulate its polyglutamine toxicity through Hsc70-4-dependent aggregation
Source: eLife. 2020 Sep 21;9:e60742. doi: 10.7554/eLife.60742 (PMC7505662; doi:10.7554/eLife.60742)
Supplement: Figure 4—source data 1. [file elife-60742-fig4-data1.xlsx]

## Sheet: Figure 4B
	NUCLEAR		CYTOPLASM
	SCA3	UIM*		SCA3	UIM*
Atxn3	509	982		3820	4430
	51.7	144		1060	2770
	1620	1830		7320	8420
Lamin	201	307	Tubulin	2310	1880
	1260	1450		1150	1000
	1600	1800		1260	1540

## Sheet: Figure 4C
SCA3 UIM* S	SCA3 UIM* P	SCA3 S	SCA3 P
278	855	1150	6300	Atxn3 signal
610	557	1030	4370	Atxn3 signal
181	568	186	2650	Atxn3 signal
433	320	464	1100	Atxn3 signal
207	328	358	703	Atxn3 signal
373	274	477	896	Atxn3 signal
947	2430	1320	1420	Loading
741	2120	384	1980	Loading
2410	11100	2260	8980	Loading
3947.49	7065.27	4554.36	7265	Loading
3421.78	6533.66	4715.2	7472.79	Loading
3142.07	6315.01	3196.4	6796.88	Loading

## Sheet: Figure 4D
SCA3	UIM*	Normalized —>	SCA3	UIM*
6.8	1.46		1	0.214706
4.59333	1.73667		1	0.378084
4.89	1.69667		1	0.346967
