# Supplementary material for: Ubiquitin-interacting motifs of ataxin-3 regulate its polyglutamine toxicity through Hsc70-4-dependent aggregation
Source: eLife. 2020 Sep 21;9:e60742. doi: 10.7554/eLife.60742 (PMC7505662; doi:10.7554/eLife.60742)
Supplement: Figure 6—source data 1. [file elife-60742-fig6-data1.xlsx]

## Sheet: Figure 6A
Ctrl	RNAi 1	RNAi 2	RNAi 3
2139	1578	1132	1126	Hsc70
2137	1756	902	1126	Hsc70
1806	1641	1670	1267	Hsc70
1436	1412	1417	1323	Hsc70
8630	7981	6308	6637	Hsc70
5711	5233	4886	5052	Hsc70
4893	4873	4894	5028	Loading
4920	4918	4913	4828	Loading
4900	5015	4998	5026	Loading
4815	4917	5832	4737	Loading
5399	5432	5268	5267	Loading
6276	6367	6158	6228	Loading

## Sheet: Figure 6D
Lane	Band No.	Band Label	Adj. Volume (Int)		Total Volume (S+R)	% SDS-R
Ctrl	1	SDS-R	1432256		4878286	29.36
Ctrl	2	SDS-S	3446030
RNAi 1	1	SDS-R	661959		4560920	14.514
RNAi 1	2	SDS-S	3898961
RNAi 2	1	SDS-R	384300		3395406	11.318
RNAi 2	2	SDS-S	3011106
RNAi 3	1	SDS-R	555744		4129020	13.459
RNAi 3	2	SDS-S	3573276
Lane	Band No.	Band Label	Adj. Volume (Int)		Total Volume (S+R)	% SDS-R
Ctrl	1	SDS-R	5762713		8990371	64.099
Ctrl	2	SDS-S	3227658
RNAi 1	1	SDS-R	1617973		4872049	33.209
RNAi 1	2	SDS-S	3254076
RNAi 2	1	SDS-R	1161985		3702331	31.385
RNAi 2	2	SDS-S	2540346
RNAi 3	1	SDS-R	1917747		5053453	37.949
RNAi 3	2	SDS-S	3135706
Lane	Band No.	Band Label	Adj. Volume (Int)		Total Volume (S+R)	% SDS-R
Ctrl	1	SDS-R	2878060		6502100	44.264
Ctrl	2	SDS-S	3624040
RNAi 1	1	SDS-R	388200		3155349	12.303
RNAi 1	2	SDS-S	2767149
RNAi 2	1	SDS-R	296840		2884358	10.291
RNAi 2	2	SDS-S	2587518
RNAi 3	1	SDS-R	1015360		6090340	16.672
RNAi 3	2	SDS-S	5074980

## Sheet: Figure 6E
Ctrl	RNAi-1	RNAi-2	RNAi-3
1.048	0.775	0.686	0.862
1	0.277	0.205	0.391
1	0.403	0.339	0.748
1	0.764	0.647	0.764
0.973	0.406	0.356	0.775
0.903	0.849	0.687	0.853
0.899	0.231	0.197	0.339
0.899	0.43	0.337	0.665
0.813	0.292	0.204	0.336
